# Supplementary material for: Voronoi polyhedra probing of hydrated OH radical
Source: Royal Society of Chemistry journal article supplement (doi:10.1039/c4ra04181j), 2014-01-01
Supplement: c4ra04181j1.pdf [file c4ra04181j1.pdf]

## Supporting Information

### Voronoi Polyhedra Probing of Hydrated OH Radical

Lukasz Kazmierczak and Dorota Swiatla-Wojcik\*

Institute of Applied Radiation Chemistry, the Faculty of Chemistry,

Lodz University of Technology, Zeromskiego 116, 90-924 Lodz, Poland

**Mathematical details on construction of VP.** Let  $C(x_0, y_0, z_0)$  and  $O_i(x_i, y_i, z_i)$  ( $i = 1, 2, \dots, N$ ) denote the central point (the radical oxygen atom) and the oxygen atom of the  $i$ -th molecule in the spherical neighbourhood of  $C$ . The equation of a plain  $\Pi_i$  bisecting the segment  $CO_i$  is given by:

$$\forall_{(x,y,z) \in \Pi_i} A_i x + B_i y + C_i z + D_i = 0 \quad (\text{S1})$$

where the coefficients  $A_i, B_i, C_i, D_i$  are defined as:

$$A_i = x_i - x_0, B_i = y_i - y_0, C_i = z_i - z_0, D_i = \frac{1}{2}(x_0^2 + y_0^2 + z_0^2 - x_i^2 - y_i^2 - z_i^2) \quad (\text{S2})$$

**The initial condition** for a point  $V_n(x_n, y_n, z_n)$  be a vertex of VP is that  $V_n$  must be the intersection of three perpendicular bisector planes. Considering intersection of any three bisector planes,  $\Pi_i, \Pi_j$  and  $\Pi_k$ , one can determine set of points  $\{V_n(x_n, y_n, z_n)\}$ , where coordinates  $x_n, y_n$ , and  $z_n$  satisfy the following set of equations:

$$\left. \begin{matrix} \exists \\ (i,j,k=1,2,\dots,N, \\ i \neq j, i \neq k, j \neq k) \end{matrix} \right\} \begin{cases} A_i x_n + B_i y_n + C_i z_n + D_i = 0 \\ A_j x_n + B_j y_n + C_j z_n + D_j = 0 \\ A_k x_n + B_k y_n + C_k z_n + D_k = 0 \end{cases} \quad (\text{S3})$$

Solution of set (S3) exists if the determinant  $W = \begin{vmatrix} A_i & B_i & C_i \\ A_j & B_j & C_j \\ A_k & B_k & C_k \end{vmatrix} \neq 0$ . Then

$$x_n = \frac{\begin{vmatrix} -D_i & B_i & C_i \\ -D_j & B_j & C_j \\ -D_k & B_k & C_k \end{vmatrix}}{W}, y_n = \frac{\begin{vmatrix} A_i & -D_i & C_i \\ A_j & -D_j & C_j \\ A_k & -D_k & C_k \end{vmatrix}}{W}, z_n = \frac{\begin{vmatrix} A_i & B_i & -D_i \\ A_j & B_j & -D_j \\ A_k & B_k & -D_k \end{vmatrix}}{W} \quad (\text{S4})$$

If  $V_n(x_n, y_n, z_n)$  is the intersection point of planes  $\Pi_i$ ,  $\Pi_j$  and  $\Pi_k$ , **the second condition** for  $V_n(x_n, y_n, z_n)$  to be classified as a vertex of VP constructed about the central point  $C(x_0, y_0, z_0)$  is expressed by Eq. (S5):

$$\forall_{\substack{l=1,2,\dots,N \\ l \neq i, l \neq j, l \neq k}} \text{sgn}(A_l x_n + B_l y_n + C_l z_n + D_l) = \text{sgn}(A_l x_0 + B_l y_0 + C_l z_0 + D_l) \quad (\text{S5})$$

The condition (S5) means that for all other bisector plains  $\Pi_l$  ( $l=1,2,\dots,N$ ,  $l \neq i, j, k$ ) the point  $V_n(x_n, y_n, z_n)$  must be located on the same side of  $\Pi_l$  as the point  $C(x_0, y_0, z_0)$ .

**Sorting of vertices** belonging to each bisector plane is required to determine VP edges and then to calculate properties of the constructed VP. We assign number 1 to an arbitrarily chosen vertex belonging to the  $i$ -th bisector plane and construct a reference vector  $\overrightarrow{M_i V_{1i}}$ , where  $M_i$  is the intersection point of  $CO_i$  line and the  $i$ -th bisector plane. Further numbering depends on the angles between the reference vector and vectors connecting  $M_i$  with the other vertices. Illustration of the sorting method is shown in Figure S1.

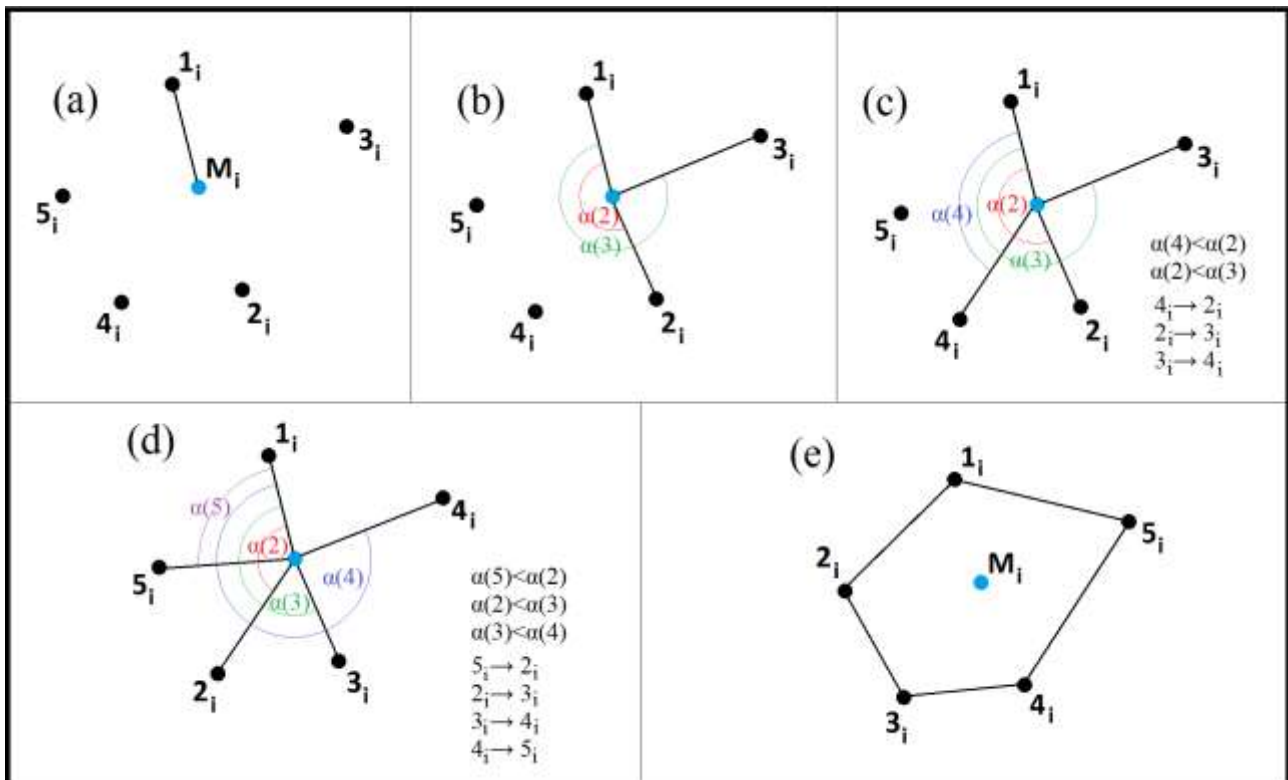

Fig. S1. Sorting of vertices belonging to the  $i$ -th bisector plane: (a) unsorted vertices and the reference vector  $\overline{M_i V_{1i}}$ ; (b)-(d) sorting of vertices (e) anti-clockwise numbered vertices connected by edges.

**Visualization methods.** We have tested 3D-visualization of the VP by three methods using graphical facilities provided by *Microsoft Excel* spreadsheet application, *Maple* computer algebra system, and *Persistence of Vision Raytracer (POV-Ray)* program. All the methods require a set of coordinates of sorted vertices belonging to the individual faces of the constructed VP.

**Microsoft Excel spreadsheet application** is suitable for simple 3D-presentation of VP. To use this program we follow the Gram-Schmidt process (see Ref. 18), which is a method for orthonormalising a set of vectors in an inner product space. We set the origin of a coordinate system in the VP centre  $C(x_0, y_0, z_0)$  and accordingly recalculate coordinates of all vertices. Then a point of view  $P(\cos \alpha \cos \beta, \sin \alpha \cos \beta, \sin \beta)$  is selected on the sphere of unit radius, where angles  $\alpha$  and  $\beta$  are defined in Fig. S2.

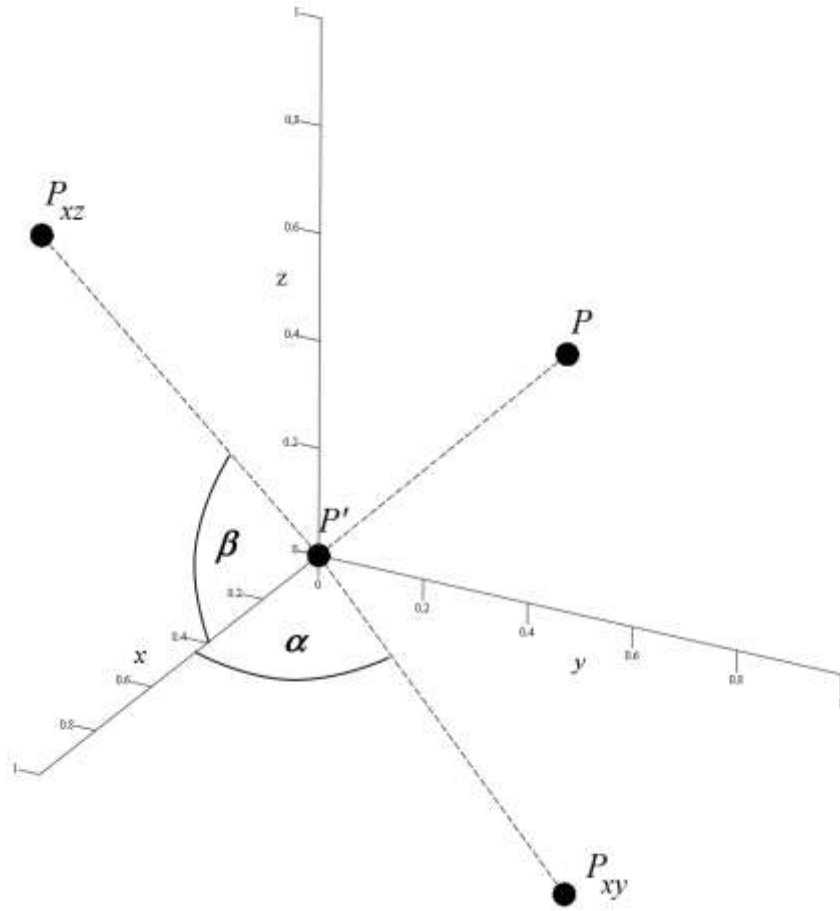

Fig. S2. Definition of angles  $\alpha$  and  $\beta$  used in the Gram-Schmidt process:  $P'(0,0,0)$  is the orthogonal projection of the point of view  $P(\cos \alpha \cos \beta, \sin \alpha \cos \beta, \sin \beta)$ ,  $P_{xy}$  is the orthogonal projection of  $P$  on the  $xy$ -plane,  $P_{xz}$  is the orthogonal projection of  $P$  on the  $xz$ -plane,  $\alpha$  is the angle between  $P'P_{xy}$  and the  $x$ -axis,  $\beta$  is the angle between  $P'P_{xz}$  and the  $x$ -axis.

Our aim is to project vertices on the plane, which contains  $\overrightarrow{P'P}$  vector. After the Gram-Schmidt process the recalculated coordinates of the  $n$ -th vertex,  $(a = x_n - x_0, b = y_n - y_0, c = z_n - z_0)$ , are given by Eq. (S6) :

$$a' = a + \frac{\cos \alpha \cos \beta}{r}; \quad b' = b + \frac{\sin \alpha \cos \beta}{r}; \quad c' = c + \frac{\sin \beta}{r} \quad (\text{S6})$$

where

$$r = \frac{-1}{a \cdot \cos \alpha \cos \beta + b \cdot \sin \alpha \cos \beta + c \cdot \sin \beta} \quad (\text{S7})$$

Rotating  $\overrightarrow{P'V_n}$  vector, where  $V_n'(a',b',c')$ , by the angle  $(-\alpha)$  and next by  $(-\beta)$ , we obtain  $V_n^1(a_1,b_1,c_1)$  and  $V_n^2(a_2,b_2,c_2)$ , expressed by Eqs. (S8) and (S9), respectively.

$$a_1 = a' \cos \alpha + b' \sin \alpha; \quad b_1 = -a' \sin \alpha + b' \cos \alpha; \quad c_1 = c' \quad (\text{S8})$$

$$a_2 = a_1 \cos \beta + c_1 \sin \beta; \quad b_2 = b_1; \quad c_2 = -a_1 \sin \beta + c_1 \cos \beta \quad (\text{S9})$$

Selecting the VP centre as a single point and using *MS Excel*Chart: XY(Scatter)-Straight-Lines option for vertices belonging to each of the *VP* faces (treated as data series) we obtain a graphical presentation of a solvation cage.

**Maple computer algebra system.** The *Maple* program offers a command-line utility and ready-to-use macros accepting basic graphical options (colour, transparency, line-style, *etc.*). It makes 3D-visualisation of a solvation cage intuitive and easy.

We start with the following calling sequences:

```
> with(plots); with(plottools);
```

Then, we define every face by using the sequence:

```
>name_of_face:=display(polygon([[coordinates_of_1st_vertex],
[coordinates_of_2nd_vertex],...],options)
```

For example:

```
>f91:=display(polygon([[15.4,12.3,3.9],[14.4,12.7,2.1],[14.2,12.6,2.0],[14.1,8.3,3.1]]),colour=COL
OUR(RGB,32/255,178/255,170/250),linestyle=solid,thickness=2,transparency=0.0);
```

Optionally, the VP centre can be defined as a single point by using the sequence:

```
>name_of_centre:=point([coordinates],options);
```

For example:

```
C9:=point([13.5,11.7,3.9],symbol=solidcircle,symbolsize=50,colour=navy);
```

Finally, we visualize the defined objects by the calling the macro:

```
>display(name_of_face_1,name_of_face_2, ...,name_of_centre);
```

***POV-Ray program*** (The Persistence of Vision Raytracer program, <http://www.povray.org/>)

*POV-Ray* program creates photo-realistic images using an advanced rendering technique, called ray-tracing. It produces very high quality images with realistic reflections, shading and perspective. The *POV-Ray* code is written in object-oriented C++. Fragments of the code used to visualize a solvation cage are given below.

The VP centre is defined by:

```
sphere
{
<Center> Radius
  [OBJECT_MODIFIERS...]
}
```

For example :

```
sphere {<13.5,11.7,3.9>0.5 texture{pigment{color rgbt<0,0,0.4>}} finish{reflection 0.1 phong
0.1}}
```

To visualize VP-faces we divided a given face (a convex polygon) into triangles and used the following sequence:

```
merge
{
  triangle
  {
    <Corner_1><Corner_2><Corner_3>
```

```

    [OBJECT_MODIFIER...]
  }
  ...
}

```

To visualize edges we used the sequence:

```

cylinder
{
<Base_Point><Cap_Point> Radius
  [open][OBJECT_MODIFIERS...]
}

```

Finally, all the defined objects were combined:

```

union
{
sphere
  {...}
merge
  {
    triangle
    {...}
    ...
  }
merge
  {
cylinder
  {...)
  ...
  }

```

The centre of a Voronoi-cell

Faces

Edges
